# Supplementary material for: Dynamics of the Emerging Genogroup of Infectious Bursal Disease Virus Infection in Broiler Farms in South Korea: A Nationwide Study
Source: MDPI journal article supplement (doi:10.3390/v14081604), 2022-07-22
Supplement: s1 [file s1]

**Table S1.** Sampling scheme and sample size calculation of broiler chicken farms for the prevalence estimation of infectious bursal disease virus infection in South Korea.

| Poultry abattoir (n=43) | Annual number of chickens slaughtered in South Korea (year of 2019) | Proportion of chickens slaughtered over total number (%) | Designed number of samples collected (unit: farm) | Actual number of samples collected (unit: farm) |
|-------------------------|---------------------------------------------------------------------|----------------------------------------------------------|---------------------------------------------------|-------------------------------------------------|
| PA1                     | 21,546,591                                                          | 2.033                                                    | 4                                                 | 4                                               |
| PA2                     | 7,260,884                                                           | 0.685                                                    | 1                                                 | 0                                               |
| PA3                     | 41,050,326                                                          | 3.873                                                    | 8                                                 | 8                                               |
| PA4                     | 3,044,571                                                           | 0.287                                                    | 1                                                 | 2                                               |
| PA5                     | 20,873,127                                                          | 1.969                                                    | 4                                                 | 1                                               |
| PA6                     | 18,538,596                                                          | 1.749                                                    | 3                                                 | 3                                               |
| PA7                     | 431                                                                 | 0.000                                                    | 0                                                 | 0                                               |
| PA8                     | 12,238,989                                                          | 1.155                                                    | 2                                                 | 2                                               |
| PA9                     | 11,828,326                                                          | 1.116                                                    | 2                                                 | 2                                               |
| PA10                    | 29,499,580                                                          | 2.783                                                    | 6                                                 | 6                                               |
| PA11                    | 165,869                                                             | 0.016                                                    | 0                                                 | 0                                               |
| PA12                    | 12,929,581                                                          | 1.220                                                    | 2                                                 | 2                                               |
| PA13                    | 4,601,896                                                           | 0.434                                                    | 1                                                 | 1                                               |
| PA14                    | 26,533,081                                                          | 2.503                                                    | 5                                                 | 5                                               |
| PA15                    | 36,425,195                                                          | 3.436                                                    | 7                                                 | 6                                               |
| PA16                    | 61,365,268                                                          | 5.789                                                    | 12                                                | 16                                              |
| PA17                    | 11,908,655                                                          | 1.123                                                    | 2                                                 | 2                                               |
| PA18                    | 18,373,046                                                          | 1.733                                                    | 3                                                 | 0                                               |
| PA19                    | 28,167,972                                                          | 2.657                                                    | 5                                                 | 1                                               |
| PA20                    | 18,400,709                                                          | 1.736                                                    | 3                                                 | 3                                               |
| PA21                    | 10,298,101                                                          | 0.972                                                    | 2                                                 | 1                                               |
| PA22                    | 36,106,777                                                          | 3.406                                                    | 7                                                 | 7                                               |
| PA23                    | 15,322,968                                                          | 1.446                                                    | 3                                                 | 0                                               |
| PA24                    | 12,909,898                                                          | 1.218                                                    | 2                                                 | 4                                               |
| PA25                    | 87,656,887                                                          | 8.270                                                    | 17                                                | 16                                              |
| PA26                    | 136,083                                                             | 0.013                                                    | 0                                                 | 0                                               |
| PA27                    | 85,297,580                                                          | 8.047                                                    | 16                                                | 16                                              |
| PA28                    | 5,575,628                                                           | 0.526                                                    | 1                                                 | 0                                               |
| PA29                    | 121,532,115                                                         | 11.465                                                   | 23                                                | 24                                              |
| PA30                    | 76,079,527                                                          | 7.177                                                    | 14                                                | 11                                              |
| PA31                    | 31,565,436                                                          | 2.978                                                    | 6                                                 | 0                                               |
| PA32                    | 16,677,580                                                          | 1.573                                                    | 3                                                 | 0                                               |
| PA33                    | 1,951,691                                                           | 0.184                                                    | 0                                                 | 0                                               |
| PA34                    | 20,896,004                                                          | 1.971                                                    | 4                                                 | 4                                               |
| PA35                    | 19,603,687                                                          | 1.849                                                    | 4                                                 | 0                                               |
| PA36                    | 20,153,242                                                          | 1.901                                                    | 4                                                 | 0                                               |
| PA37                    | 1,622,197                                                           | 0.153                                                    | 0                                                 | 0                                               |
| PA38                    | 90,804,344                                                          | 8.566                                                    | 17                                                | 17                                              |
| PA39                    | 7,790,182                                                           | 0.735                                                    | 1                                                 | 1                                               |
| PA40                    | 3,103,838                                                           | 0.293                                                    | 1                                                 | 0                                               |
| PA41                    | 1,659,525                                                           | 0.157                                                    | 0                                                 | 0                                               |
| PA42                    | 3,924,415                                                           | 0.370                                                    | 1                                                 | 1                                               |
| PA43                    | 4,574,092                                                           | 0.432                                                    | 1                                                 | 1                                               |
| Total                   | 1,059,994,490                                                       | 100.000                                                  | 200                                               | 167                                             |

\* Designed number of samples collected in each abattoir (unit: farm) was calculated by multiplying the proportion of chickens slaughtered over the total number of chickens slaughtered across the country with designed total sample size (200).
